# Supplementary material for: Standard inocula preparations reduce the bacterial diversity and reliability of regulatory biodegradation tests
Source: PubMed Central journal article supplement (PMC4133024; doi:10.1007/s11356-013-2064-4), 2013-09-17
Supplement: 11356_2013_2064_MOESM1_ESM.pdf [file 11356_2013_2064_MOESM1_ESM.pdf]

**Supporting Information:**

**Standard Inocula Preparations Reduce the Bacterial Diversity and Reliability of Regulatory Biodegradation Tests**

**Andrew K Goodhead · Ian M Head · Jason R Snape · Russell J. Davenport**

A.K. Goodhead

Sartorius Mechatronics UK Limited, Longmead Business Centre, Blenheim Road, Epsom, Surrey,  
KT19 9QQ, UK

I.M. Head · R. J. Davenport (✉)

School of Civil Engineering and Geosciences, Cassie Building, Newcastle University, Newcastle upon  
Tyne, NE1 7RU, UK.

e-mail: [russell.davenport@ncl.ac.uk](mailto:russell.davenport@ncl.ac.uk)

J. R. Snape

Astrazeneca UK Ltd, Brixham Environmental Laboratory, Freshwater Quarry, Brixham, Devon, TQ5  
8BA, UK.

Supporting information is provided as a compilation of closest relatives and their similarities with the  
sequence of dominant bands excised from the DGGE gels.

| Material | Page |
|----------|------|
| Table S1 | S2   |

Nearest neighbour and RDP classification of excised band sequences  
from the supernatant of activated sludge and its unprocessed  
counterpart.

**Table S1.** Nearest neighbour and RDP classification of excised band sequences from the supernatant of activated sludge and its unprocessed counterpart.

| Band <sup>§</sup>  | Closest relative and accession number                           | RDP classification*                 | Percent identity         | Origin                         | Reference                      |
|--------------------|-----------------------------------------------------------------|-------------------------------------|--------------------------|--------------------------------|--------------------------------|
|                    | <i>Erwinia persicinus</i> (AM184098)                            | family<br><i>Enterobacteriaceae</i> | 100.0, <sup>a</sup> 95.5 | Processed vegetables           | [46]Randazzo et al. (2009)     |
| 1,2,5 <sup>a</sup> | <i>Klebsiella sp.</i> HBB9 (EU074057)                           | family<br><i>Enterobacteriaceae</i> | 100.0, <sup>a</sup> 95.5 | Grapevine juice                |                                |
|                    | <i>Enterobacter hormaethei</i> subsp. Steigerwaltii (AJ853890)  | family<br><i>Enterobacteriaceae</i> | 100.0, <sup>a</sup> 95.5 | Surgical skin wound            | [47]Hoffmann, H. (2005)        |
|                    | Sludge granule bacterium (EF190022)                             | family<br><i>Enterobacteriaceae</i> | 100.0, <sup>a</sup> 95.5 | Sludge granules                | [48]Adav et al., (2007)        |
| 3                  | <i>Roseobacter sp.</i> TKW (DQ479380)                           | class<br><i>Betaproteobacteria</i>  | 81.5                     | Kuwaiti coastal water          | [49]Al-Sarawi et al. (2008)    |
| 4                  | <i>Microscilla sp.</i> MED571 (EU253600)                        | no root                             | 49.3                     | NW Mediterranean surface water |                                |
| 6                  | Uncultured bacterium clone FCPS400 (EF516835 )                  | class<br><i>Betaproteobacteria</i>  | 78                       | Californian grassland soil     | [50]Cruz-Martinez et al (2009) |
| 7                  | Uncultured <i>Dechloromonas sp.</i> clone KS-488 (EU809559)     | phylum<br><i>Proteobacteria</i>     | 81.4                     | Indian soil                    | [51]Srinivas et al. (2011)     |
| 8                  | <i>Flavobacterium gelidacus</i> type strain LMG21477 (AJ440996) | genus<br><i>Flavobacterium</i>      | 71.4                     | Antarctic microbial mat        | [52]van Trappen et al. (2002)  |

<sup>§</sup>Band numbers correspond to those excised from the DGGE gel (Figure 1); <sup>a</sup> percentage identity for band 5 only; \* using the Ribosomal Database

Project (RDP) Classifier tool.
